# Supplementary material
Source: MDPI journal article supplement (https://www.mdpi.com/2072-4292/14/24/6234)
Supplement: s1 [file s1]

# Supplementary material

1 Table S1 List of spectral indices generated for Sentinel-2 imagery

**Table S1.** List of spectral indices generated for Sentinel-2 imagery

| No.                              | Spectral indices                                               | Calculation formulas                                                                                                                             | References |
|----------------------------------|----------------------------------------------------------------|--------------------------------------------------------------------------------------------------------------------------------------------------|------------|
| <b>Red edge position indices</b> |                                                                |                                                                                                                                                  |            |
| 1                                | Chlorophyll Green Index<br>(Chlogreen)                         | $\text{Chlogreen} = \frac{\text{NIR2}}{\text{Green} + \text{Rededge1}}$                                                                          | [1]        |
| 2                                | Leaf Anthocyanid Content<br>(LAnthoC)                          | $\text{LAnthoC} = \frac{\text{Rededge3}}{\text{Green} - \text{Rededge1}}$                                                                        | [2]        |
| 3                                | Leaf Carotenoid Content<br>(LCaroC)                            | $\text{LCaroC} = \frac{\text{Rededge3}}{\text{Blue} - \text{Rededge1}}$                                                                          | [2]        |
| 4                                | Leaf Chlorophyll Content<br>(LChloC)                           | $\text{LChloC} = \frac{\text{Rededge3}}{\text{Rededge1}}$                                                                                        | [2]        |
| 5                                | Normalized Difference of Red-edge and SWIR2<br>(NDrededgeSWIR) | $\text{NDrededgeSWIR} = \frac{\text{Rededge2} - \text{SWIR2}}{\text{Rededge2} + \text{SWIR2}}$                                                   | [3]        |
| 6                                | Red-edge Normalized Difference Vegetation Index 1 (NDVIre1)    | $\text{NDVIre1} = \frac{\text{NIR2} - \text{Rededge1}}{\text{NIR2} + \text{Rededge1}}$                                                           | [4]        |
| 7                                | Red-edge Normalized Difference Vegetation Index 2 (NDVIre2)    | $\text{NDVIre2} = \frac{\text{NIR2} - \text{Rededge2}}{\text{NIR2} + \text{Rededge2}}$                                                           | [5]        |
| 8                                | Red-edge Normalized Difference Vegetation Index 3 (NDVIre3)    | $\text{NDVIre3} = \frac{\text{NIR2} - \text{Rededge3}}{\text{NIR2} + \text{Rededge3}}$                                                           | [5]        |
| 9                                | Red-edge Peak Area<br>(RededgePeakArea)                        | $\begin{aligned} \text{RededgePeakArea} &= \text{Red} + \text{Rededge1} \\ &+ \text{Rededge2} \\ &+ \text{Rededge3} + \text{NIR2} \end{aligned}$ | [3]        |
| 10                               | Simple Blue and Red-edge 1 Ratio<br>(SR-BlueRededge1)          | $\text{SR} - \text{BlueRededge1} = \frac{\text{Blue}}{\text{Rededge1}}$                                                                          | [6]        |
| 11                               | Simple Blue and Red-edge 2 Ratio<br>(SR-BlueRededge2)          | $\text{SR} - \text{BlueRededge2} = \frac{\text{Blue}}{\text{Rededge2}}$                                                                          | [7]        |
| 12                               | Simple Blue and Red-edge 3 Ratio<br>(SR-BlueRededge3)          | $\text{SR} - \text{BlueRededge3} = \frac{\text{Blue}}{\text{Rededge3}}$                                                                          | [8]        |
| 13                               | Normalized Difference Red-edge 1 (NDre1)                       | $\text{NDre1} = \frac{\text{Rededge2} - \text{Rededge1}}{\text{Rededge2} + \text{Rededge1}}$                                                     | [4]        |
| 14                               | Normalized Difference Red-edge 2 (NDre2)                       | $\text{NDre2} = \frac{\text{Rededge3} - \text{Rededge1}}{\text{Rededge3} + \text{Rededge1}}$                                                     | [4]        |

|                                   |                                                   |                                                                 |      |
|-----------------------------------|---------------------------------------------------|-----------------------------------------------------------------|------|
| 15                                | Chlorophyll Index Red-edge<br>(CI <sub>re</sub> ) | $CI_{re} = \frac{Rededge3}{Rededge1 - 1}$                       | [9]  |
| <b>Reference spectral indices</b> |                                                   |                                                                 |      |
| 16                                | Normalized Difference Vegetation<br>Index (NDVI)  | $NDVI = \frac{NIR2 - Red}{NIR2 + Red}$                          | [10] |
| 17                                | Difference Vegetation Index<br>(DVI)              | $DVI = NIR2 - Red$                                              | [10] |
| 18                                | Enhanced Vegetation Index<br>(EVI)                | $EVI = 2.5 \times \frac{NIR2 - Red}{NIR2 + 6Red + 7.5Blue + 1}$ | [11] |
| 19                                | Built-up Area Index (BAI)                         | $BAI = \frac{Blue - NIR2}{Blue + NIR2}$                         | [1]  |
| 20                                | Greenness Index (GI)                              | $GI = \frac{Green}{Red}$                                        | [1]  |
| 21                                | Moisture Stress Index (MSI)                       | $MSI = \frac{SWIR1}{NIR2}$                                      | [1]  |
| 22                                | Normalized Difference Tillage<br>Index (NDTI)     | $NDTI = \frac{SWIR1 - SWIR2}{SWIR1 + SWIR2}$                    | [12] |
| 23                                | Normalized Green (Norm-G)                         | $Norm - G = \frac{Green}{NIR1 + Red + Green}$                   | [13] |
| 24                                | Normalized Near Infra-red<br>(Norm-NIR)           | $Norm - NIR = \frac{NIR1}{NIR1 + Red + Green}$                  | [13] |
| 25                                | Normalized Red (Norm-R)                           | $Norm - R = \frac{Red}{NIR1 + Red + Green}$                     | [13] |
| 26                                | Normalized Difference Water<br>Index 1 (NDWI1)    | $NDWI1 = \frac{NIR2 - SWIR1}{NIR2 + SWIR1}$                     | [14] |
| 27                                | Normalized Difference Water<br>Index 2 (NDWI2)    | $NDWI2 = \frac{Green - NIR2}{Green + NIR2}$                     | [4]  |
| 28                                | Normalized Humidity Index<br>(NHI)                | $NHI = \frac{SWIR1 - Green}{SWIR1 + Green}$                     | [1]  |
| 29                                | Soil Adjusted Vegetation Index<br>(SAVI)          | $SAVI = \frac{NIR2 - Red}{NIR2 + Red + 0.5} \times 1.5$         | [1]  |
| 30                                | Bands Difference (RedSWIR1)                       | $RedSWIR1 = Red - SWIR1$                                        | [1]  |
| 31                                | Ratio Vegetation Index (RVI)                      | $RVI = \frac{NIR2}{Red}$                                        | [10] |
| 32                                | Water Body Index (WBI)                            | $WBI = \frac{Blue - Red}{Blue + Red}$                           | [1]  |
| 33                                | Soil Tillage Index (STI)                          | $STI = \frac{SWIR1}{SWIR2}$                                     | [12] |

2 Table S2 Carbon density of each component in different land cover types in different years

**Table S2.** Carbon density of each component in different land cover types in different years (units: t/ha).

| Vegetation with different years | C_above | C_below | C_soil | C_dead | Vegetation with different years | C_above | C_below | C_soil | C_dead |
|---------------------------------|---------|---------|--------|--------|---------------------------------|---------|---------|--------|--------|
| Rubber (1 year)                 | 7       | 3       | 132    | 0      | Natural forest (+1 year)        | 80      | 16      | 100    | 25     |
| Rubber (2 years)                | 9       | 3       | 132    | 0      | Natural forest (+2 years)       | 83      | 17      | 101    | 26     |
| Rubber (3 years)                | 10      | 4       | 126    | 1      | Natural forest (+3 years)       | 86      | 18      | 102    | 27     |
| Rubber (4 years)                | 12      | 4       | 126    | 1      | Natural forest (+4 years)       | 89      | 19      | 103    | 28     |
| Rubber (5 years)                | 13      | 5       | 126    | 1      | Natural forest (+5 years)       | 92      | 20      | 104    | 29     |
| Rubber (6 years)                | 15      | 5       | 120    | 2      | Natural forest (+6 years)       | 95      | 21      | 105    | 30     |
| Rubber (7 years)                | 17      | 6       | 120    | 2      | Natural forest (+7 years)       | 98      | 22      | 106    | 31     |
| Rubber (8 years)                | 20      | 6       | 120    | 2      | Natural forest (+8 years)       | 101     | 23      | 107    | 32     |
| Rubber (9 years)                | 23      | 7       | 120    | 3      | Natural forest (+9 years)       | 104     | 24      | 108    | 33     |
| Rubber (10 years)               | 26      | 7       | 120    | 3      | Natural forest (+10 years)      | 107     | 25      | 109    | 34     |
| Rubber (11 years)               | 29      | 8       | 120    | 3      | Natural forest (+11 years)      | 110     | 26      | 110    | 35     |
| Rubber (12 years)               | 35      | 9       | 114    | 3      | Natural forest (+12 years)      | 113     | 27      | 111    | 36     |
| Rubber (13 years)               | 37      | 10      | 114    | 3      | Natural forest (+13 years)      | 116     | 28      | 112    | 37     |
| Rubber (14 years)               | 42      | 11      | 114    | 3      | Natural forest (+14 years)      | 119     | 29      | 113    | 38     |
| Rubber (15 years)               | 48      | 12      | 114    | 4      | Natural forest (+15 years)      | 122     | 30      | 114    | 39     |
| Rubber (16 years)               | 54      | 13      | 114    | 4      | Natural forest (+16 years)      | 125     | 31      | 115    | 40     |
| Rubber (17 years)               | 62      | 14      | 114    | 4      | Natural forest (+17 years)      | 128     | 32      | 116    | 41     |
| Rubber (18 years)               | 70      | 15      | 108    | 4      | Natural forest (+18 years)      | 131     | 33      | 117    | 42     |
| Rubber (19 years)               | 75      | 16      | 108    | 4      | Natural forest (+19 years)      | 134     | 34      | 118    | 43     |
| Rubber ( $\geq 20$ years)       | 80      | 16      | 108    | 4      | Natural forest (+20 years)      | 137     | 35      | 119    | 44     |
| Cultivated land                 | 5       | 5       | 15     | 0      |                                 |         |         |        |        |

**Note:** C\_above, C\_below, C\_soil, and C\_dead represented the carbon density of above-ground, below-ground, soil, and dead matter, respectively.

### 3 Table S3 Confusion matrix of the forest and rubber plantation mapping

**Table S3.** Confusion matrix of the forest and rubber plantation mapping.

|                                     | Forest         | Non-forest        | Total | Producer's Accuracy |
|-------------------------------------|----------------|-------------------|-------|---------------------|
| Forest                              | 237            | 20                | 257   | 92.22%              |
| Non-forest                          | 19             | 213               | 232   | 91.81%              |
| Total                               | 256            | 233               | 489   |                     |
| User's accuracy                     | 92.58%         | 91.42%            |       |                     |
| Overall accuracy: 0.92; kappa: 0.84 |                |                   |       |                     |
|                                     | Natural forest | Rubber plantation | Total | Producer's Accuracy |
| Natural forest                      | 90             | 12                | 102   | 88.24%              |
| Rubber                              | 10             | 139               | 149   | 93.29%              |
| Total                               | 100            | 151               | 251   |                     |
| User's accuracy                     | 90.00%         | 92.05%            |       |                     |
| Overall accuracy: 0.91; kappa: 0.82 |                |                   |       |                     |

4 Table S4 Confusion matrix of identification results of rubber planting years

**Table S4.** Confusion matrix of identification results of rubber planting years.

[illegible]

5 Figure S1 List of spectral indices generated for Sentinel-2 imagery

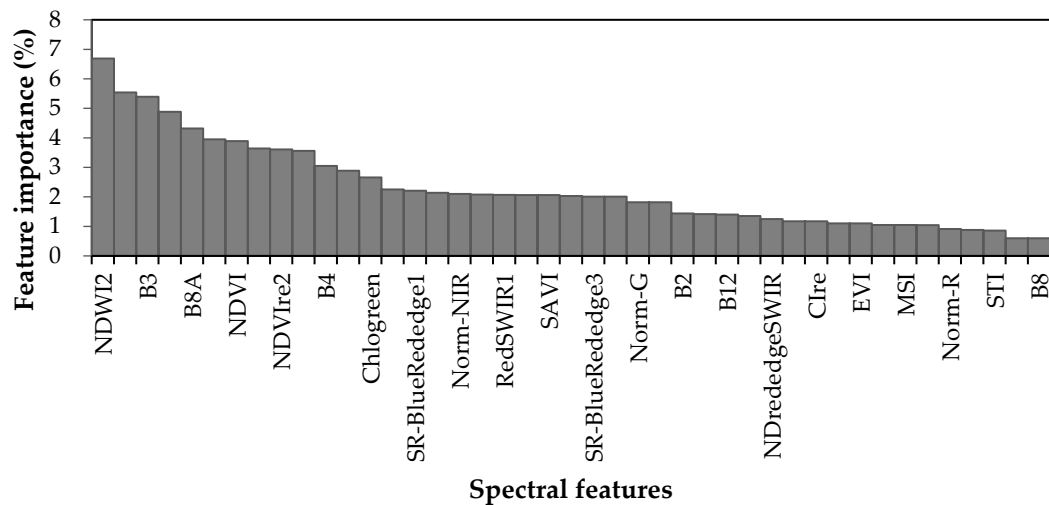

**Figure S1.** Importance statistics of spectral features.

## References

1. Bolyn, C.; Michez, A.; Gaucher, P.; Lejeune, P.; Bonnet, S. Forest mapping and species composition using supervised per pixel classification of Sentinel-2 imagery. *Biotechnol. Agron. Soc.* **2018**, *22*, 172-87.
2. H, W.; S, S. Sentinel-2: land cover, preliminary user feedback on Sentinel-2a data. Proceedings of the Proceedings of the Sentinel-2a expert users technical meeting. Frascati, Italy, 2015.
3. Radoux, J.; Chomé, G.; Jacques, D.; Waldner, F.; Bellemans, N.; Matton, N.; Lamarche, C.; D Andrimont, R.; Defourny, P. Sentinel-2's Potential for Sub-Pixel Landscape Feature Detection. *Remote Sens.* **2016**, *8*, 488.
4. Gitelson, A.; Merzlyak, M.N. Spectral Reflectance Changes Associated with Autumn Senescence of *Aesculus hippocastanum* L. and *Acer platanoides* L. Leaves. Spectral Features and Relation to Chlorophyll Estimation. *J. Plant Physiol.* **1994**, *143*, 286-92.
5. Fernández-Manso, A.; Fernández-Manso, O.; Quintano, C. SENTINEL-2A red-edge spectral indices suitability for discriminating burn severity. *Int. J. Appl. Earth Obs. Geoinf.* **2016**, *50*, 170-5.
6. le Maire, G.; François, C.; Dufrêne, E. Towards universal broad leaf chlorophyll indices using PROSPECT simulated database and hyperspectral reflectance measurements. *Remote Sens. Environ.* **2004**, *89*, 1-28.
7. Lichtenthaler, H.K.; Lang, M.; Sowinska, M.; Heisel, F.; Miehe, J.A. Detection of Vegetation Stress Via a New High Resolution Fluorescence Imaging System. *J. Plant Physiol.* **1996**, *148*, 599-612.
8. Immitzer, M.; Vuolo, F.; Atzberger, C. First Experience with Sentinel-2 Data for Crop and Tree Species Classifications in Central Europe. *Remote Sens.* **2016**, *8*, 166.
9. Gitelson, A.A.; Gritz, Y.; Merzlyak, M.N. Relationships between leaf chlorophyll content and spectral reflectance and algorithms for non-destructive chlorophyll assessment in higher plant leaves. *J. Plant Physiol.* **2003**, *160*, 271-82.

10. Broge, N.H.; Mortensen, J.V. Deriving green crop area index and canopy chlorophyll density of winter wheat from spectral reflectance data. *Remote Sens. Environ.* **2002**, *81*, 45-57.
11. Zeng, Y.; Hao, D.; Huete, A.; Dechant, B.; Berry, J.; Chen, J.M.; Joiner, J.; Frankenberg, C.; Bond-Lamberty, B.; Ryu, Y.; *et al.*. Optical vegetation indices for monitoring terrestrial ecosystems globally. *Nat. Rev. Earth Environ.* **2022**, *3*, 477-93.
12. VanDeventer, A.; Ward, A.; Gowda, P.; Lyon, J. Using Thematic Mapper data to identify contrasting soil plains and tillage practices. *Photogramm. Eng. Remote Sens.* **1997**, 87-93.
13. Sripada, R.P.; Heiniger, R.W.; White, J.G.; Meijer, A.D. Aerial Color Infrared Photography for Determining Early In-Season Nitrogen Requirements in Corn. *Agron. J.* **2006**, *98*, 968-77.
14. Gao, B. NDWI—A normalized difference water index for remote sensing of vegetation liquid water from space. *Remote Sens. Environ.* **1996**, *58*, 257-66.
